# Supplementary material
Source: PubMed Central journal article supplement (PMC3027471)
Supplement: supp_214_4_582__3.pdf [file supp_214_4_582__3.pdf]

|                                | 141             | 150        | 160          | 170       | 182     | 190             | 200              | 210             | 220            |      |
|--------------------------------|-----------------|------------|--------------|-----------|---------|-----------------|------------------|-----------------|----------------|------|
| <i>Apis mellifera</i>          | QVDTQGENAVKVN   | SVQVPTDD   | --EPYASFKAME |           | YDIA--- | PLSDFVIHRSPELVP | -----MPTLK       | -GDGRHMEVIKIKNF | DNC            |      |
| <i>Athalia rosae</i>           | QVDTQGENAMKSR   | YNQPEEGD   | --QAYATYKAME |           | YDIS--- | PLPEYVLQTKPELAP | -----VPQLK       | -GSGQIIDIVKTSN  | FSNC           |      |
| <i>Pimpla nipponica</i>        | QVDTQGENLMASK   | YNQPEPEDE  | --GVTAMFKTME |           | YDIN--- | PLPEFVLQKRPELVP | -----MPDIR       | -GDGEIIDIVKTKN  | YSNC           |      |
| <i>Pteromalus puparum</i>      | QVDTQGENAIRSK   | HNFPEGK    | --QPYALFKVME |           | YDVS--- | ALPDRVVQTNPELVP | -----IPELR       | -EDGDIISLVKTKN  | SNC            |      |
| <i>Encarsia formosa</i>        | QVDARGQNAEYSK   | HNFPEGK    | --QPYAIFKTR  |           | YDIS--- | PLPEEVLQSQPELVP | -----MPELR       | -GGDGEHISIKTRNF | SNT            |      |
| <i>Bombus igitus</i>           | QVDSLGENAIRTSEM | QIPTDE     | --HPYGMFRAME |           | YDIT--- | PLPEQNVYVQPELVP | -----VPDLK       | -REGQYIDIRKSN   | FNKC           |      |
| <i>Bombus hypocrite</i>        | QVDSLGENAIRTSET | QIPTDE     | --YPYGMFRAME |           | YDIM--- | PLPEPNLYVQPELVP | -----VPDLK       | -REGHYIDIRKSN   | FNKC           |      |
| <i>Solenopsis invicta</i>      | QVDLQGENVIASSD  | NQIPDD     | --QPFVYKAME  |           | YSIT--- | PVPEN           | -----FDSIP       | -----FPNLR      | -KDGLNFFVTKTKN | YNKC |
| <i>Solenopsis invicta2</i>     | QVDTQGENAINSK   | SIQVPSDE   | --SFAATFKAME |           | YEIT--- | PLTVNEIQAKQDRIP | -----MPSLH       | -SDGNHYEVKKL    | KNYERC         |      |
| <i>Riptortus clavatus</i>      | QVDTQGKNLKD     | SKINLVP    | SGQSGEP      | MPGVYKTME | YDIS--- | VLPEYILQARPELAP | -----LPHLK       | -GDGEFIEVVKTR   | NRNFSNS        |      |
| <i>Homalodisca coagulate</i>   | QVDTQAENLQKSR   | INSLPTQE   | --TVNGVYKTME |           | YDIS--- | PLPKVVLQNKPELAP | -----MPHLQ       | -ADGQLIDIVKTM   | NFSNC          |      |
| <i>Anthonomus grandis</i>      | QMDLQGENALQNP   | TSSFPINE   | --YMDAVFKTME |           | YDIH--- | RLPEYLVQSQPWIA  | -----QYKLR       | -GEGDLIEVLSKSN  | YNTA           |      |
| <i>Lethocerus deyrollei</i>    | QIDTAARNLQKSR   | INQLPAMH   | --KPMGVYKTME |           | YDVS--- | PLPDYLLQSKPELAP | -----LPHLR       | -ADGRIIEIVKTR   | NRNFSNC        |      |
| <i>Aedes aegypti</i>           | QVDRGANLMHSSK   | PIHPSKN    | --EWNHYKVM   |           | YDVS--- | LIPAYMIQAHKQWVP | -----QGQLR       | -GEGDGFQFIQV    | TQNFDR         |      |
| <i>Nilaparvata lugens</i>      | QVDVTGQNAIKSR   | RNIVPNGQ   | --QVSGSPKVM  |           | YDVS--- | ELPMRVVQHP      | PEIAPLAVK        | QGGQGGQGS       | SRSLIQVVKSRNF  | SNC  |
| <i>Graptosaltia nigrofusca</i> | QFDTEGENIQKSR   | SNSLFDNSDD | --PVVTFKTME  |           | YDFS--- | PLLKQELMENPKLAP | RVG---LSKLN      | --DIGLFRVVK     | TINYNDC        |      |
| <i>Antheraea pernyi</i>        | QLDLSTHRNIHGS   | QDSYDRE    | --KQGLFRKME  |           | YSVS--- | PVASEWRRELPKFAS | -----QEDPIE      | ITKSKNYGHC      |                |      |
| <i>Saturnia japonica</i>       | QLDLSTHRNIQGS   | QNRDQEQ    | --KQGLFRKME  |           | YTVS--- | PVASEWRRELPKFAS | -----EDPIE       | ITKSKNYGHC      |                |      |
| <i>Periplaneta americana</i>   | QVNTQADNLVHR    | RYNILPNAS  | --TDSAVYSIRE |           | YDVS--- | PLPALPLLQHP     | PELAP-----LSNVND | NVIDIEK         | TQNFNSNC       |      |
| <i>Blattella germanica</i>     | QVVVDEDKK       |            | -----VYRVFE  |           | YEV     | DHLYPTTYLNP     | QWTQQHD-----TKLR | IMKTHQFT        | TNC            |      |
| <i>Leucophaea maderae</i>      | QLTTQPSFK       |            | -----PVYRVKE |           | YDFS--- | PLLKTEMKLWNYLDN | -----DNLQV       | TRTQNI          | SHC            |      |
| <i>Ichthyomyzon unicuspis</i>  | QLSLKKNQ        |            | -----QTFELQE |           | YVVQ--- | EGYRT           | -----NEMAV       | VKTKDL          | LNNC           |      |
| <i>Acipenser transmontanus</i> | QLTIKKTQ        |            | -----NVYGLQE |           | YVIQ--- | EDRKA           | -----NKIIV       | TKSKDL          | LNNC           |      |
| <i>Oreochromis aureus</i>      | QLNVKKTQ        |            | -----NVYEMQE |           | YVIR--- | EDARA           | -----ERIH        | LTKTKDL         | NHC            |      |
| <i>Oncorhynchus mykiss</i>     | QLNIKKTQ        |            | -----NVYELQE |           | YVIR--- | EDAKA           | -----ERIH        | LTKSKDL         | LNNC           |      |
| <i>Fundulus heteroclitus</i>   | QLNIKKTQ        |            | -----KVYDLQE |           | YSIS--- | EDARI           | -----ENILL       | TKTRDL          | SNC            |      |
| <i>Xenopus laevis A2</i>       | QVTIKKSQ        |            | -----DVYDLQE |           | YVIQ--- | EDKRG           | -----DQIRI       | IKSTDF          | FNNC           |      |
| <i>Anolis carolinensis</i>     | QITIKKSQ        |            | -----NVYELQE |           | YVIQ--- | EDRKN           | -----SRIF        | VTKTV           | DSN            |      |
| <i>Gallus gallus</i>           | QMTIKKSQ        |            | -----NVYELQE |           | YVIQ--- | EDRKN           | -----SRIY        | VRTV            | DLN            |      |
| <i>Homo sapiens MTP</i>        | QTQLSSGT        |            | -----TNE     |           | YQAH--- | QDK             | -----VTKI        | KAL             | DS             |      |
