# Supplementary material
Source: PubMed Central journal article supplement (PMC3027471)

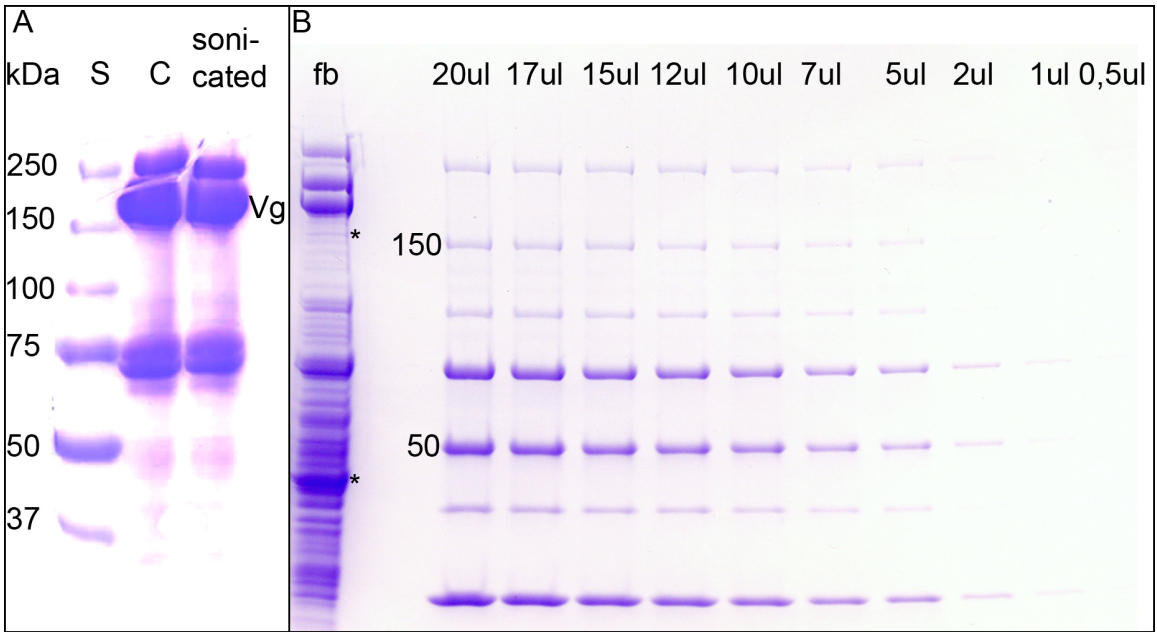

Supplement: supp_214_4_582__1.pdf [file supp_214_4_582__1.pdf]

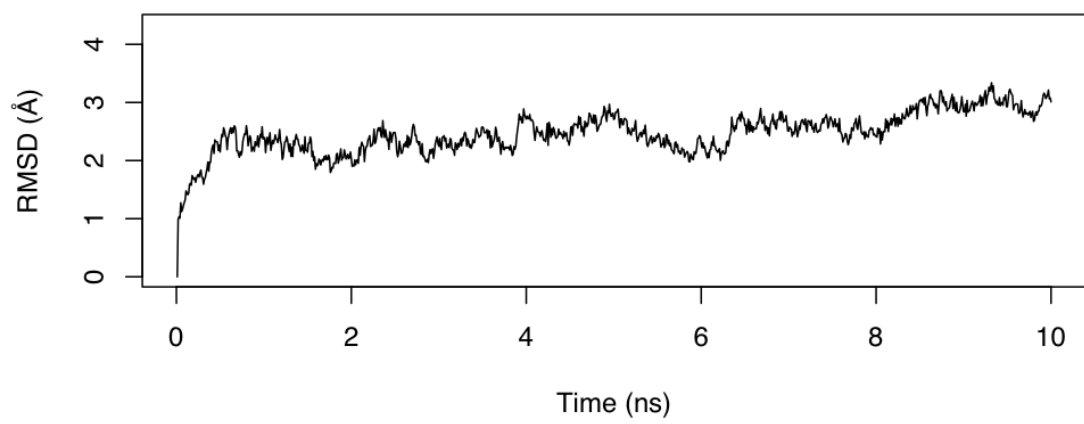

Supplement: supp_214_4_582__2.pdf [file supp_214_4_582__2.pdf]
